# Supplementary material for: Explicit but Not Implicit Memory Predicts Ultimate Attainment in the Native Language
Source: Front Psychol. 2020 Sep 25;11:569586. doi: 10.3389/fpsyg.2020.569586 (PMC7546274; doi:10.3389/fpsyg.2020.569586)
Supplement: Supplementary file 1 [file Data_Sheet_1.XLSX]

## Sheet: Sheet1
participant	coll_eng	gjt_eng	voc_eng	digit_span	SRT	LLAMA	srt_slope	readMix	group
5r7ulw	0.725	0.966667	0.675	0.666667	34.4162	0.6	-0.000906601	1	low
8e1asn	0.425	0.833333	0.675	0.571429	-3.76951	0.55	-0.000323097	3	low
ada170	0.375	0.75	0.5		-73.4904	0.3	0.00180813	1.5	low
ALE118	0.425	0.783333	0.65	0.571429		0.2	-0.000320813	3	low
als961	0.225	0.716667	0.4	0.285714	33.3524	0.2	-0.000771009	1.5	low
bil963		0.716667	0.55	0.476191	33.4884	0.2	0.000148943	1	low
cae180	0.4	0.85	0.6	0.428571	-37.848	0.55	0.000574555	2	low
cod180	0.6	0.75	0.7	0.714286	38.965	0.3	0.000661968	1	low
COU825	0.3		0.25	0.238095	-20.7844	0	0.000365272	2.5	low
eth548	0.425	0.616667	0.55	0.333333	-24.2065	0.05	-0.000354596	2.5	low
fra292	0.425	0.583333	0.6	0.52381	64.4905	0.3	-0.00264296	2	low
jor150	0.3	0.483333	0.6	0.238095	19.82	0.25	0.000498693	4	low
jos170	0.325	0.6		0.238095	-16.0136	0.25	-0.000918146	2.5	low
LLO118	0.625	0.8	0.65	0.428571	40.7262	0.3	-0.00158423	2.5	low
lou180	0.525	0.85	0.6	0.52381	21.6107	0.7	0.000305612	0	low
MAR020	0.3	0.666667	0.45	0.190476	-58.8906	0.2	0.000492113	2	low
MYL462	0.575	0.75	0.5	0.428571	70.3449	0.3	-0.000774257	1.5	low
sad856	0.325	0.7	0.4	0.571429	-8.09051	0.05	0.00102817	1	low
tar319	0.4	0.633333	0.5	0.238095	-255.654	0.1	0.00275268	1.5	low
tyl180	0.275	0.65	0.475	0.380952	198.481	0.1	0.000375418	1.5	low
5a2cam	0.65	0.833333	0.775	0.428571	79.5876	0.45	-0.00060581	6	high
606ERR	0.65	0.966667	0.65	0.619048	111.225	0.55	-0.00161014	2	high
6E1AJL	0.725	0.916667	0.85	0.571429	76.6148	0.9	-0.00142543	5	high
6L5IPL	0.825	0.916667	0.85	0.571429	44.3648	0.9	-0.000332932	3	high
6o3anh	0.725	0.85	0.725		45.466	0.55	-0.00154392	4	high
6O6GAD	0.65	0.95	0.725	0.380952	-26.9517	0.7	0.000504937	3	high
6R8SCD	0.475	0.8	0.65	0.333333	-18.2355	0.5	0.000203427	3.5	high
6t7ysc	0.725	0.916667	0.85	0.52381	-0.520862	0.6	0.00033347	2.5	high
7a9icn	0.325	0.816667	0.65	0.333333	38.912	0.3	-0.000862897	6	high
7B6AEE	0.75	0.9	0.8	0.52381	30.2072	0.95	-0.000705749	3	high
7e7eSn	0.825	0.916667	0.875	0.666667	71.4066	0.6	-0.00168054	5	high
7E8UCK	0.725	0.883333	0.85	0.714286	55.9419	0.5	-0.00229617	4.5	high
7I0PFY	0.75	0.95	0.9	0.619048	8.31594	0.4	-0.000530006	2	high
7i1bai	0.775	0.966667	0.6	0.619048	69.6466	0.4	0.000240256	4	high
7I8AKT	0.475	0.933333	0.725	0.809524	-20.8987	0.6	-0.00208879	4.5	high
7L5ARN	0.75	0.933333	0.8	0.666667	41.2558	0.55	-0.00138728	6	high
7o2crt	0.725	0.9	0.9	0.619048	12.5101	0.55	0.000477016	2.5	high
7O3HHH	0.875	0.966667	0.775	0.476191	16.7736	0.65	8.39055e-05	5	high
7O9OLS	0.725	0.95	0.75	0.952381	16.1266	0.8	-0.00162459	2.5	high
7R4UAT	0.7	0.866667	0.725	0.666667	47.7637	0.65	-3.37004e-05	3.5	high
7r7ikl	0.675	0.983333	0.75	0.857143	48.5533	0.3	-0.00123436	4	high
7U9RKG	0.85	0.983333	0.9	0.714286	27.2929	0.4	-0.000984492	4.5	high
7yonhs	0.625	0.933333	0.975	0.619048	-3.98602	0.9	-0.000293195	2.5	high
8a0hck	0.85	0.883333	0.825	0.714286	-1.30393	0.55	0.000128963	2	high
8a5umd	0.875	0.883333	0.85	0.476191	97.8251	0.5	-0.00342224	2	high
8e0pnd	0.675	0.85	0.825	0.428571	56.1595	0.2	-0.00140719	6	high
8E6APG	0.625	0.933333	0.65	0.380952	-24.2493	0.6	8.79783e-05	3	high
8h2rmn	0.65	0.9	0.775	0.476191	47.5255	0.9	2.5679e-05	3.5	high
8H3GTH	0.775	0.916667	0.725	0.428571	-46.8224	0.85	-0.000473152	3.5	high
8l8agl	0.8	0.916667	0.9	0.476191	-33.7331	0.35	0.000567938	2.5	high
8N2IFW	0.7	0.9	0.8	0.476191	13.211	0.35	-0.000563233	3.5	high
8o0waw	0.825	0.933333	0.875	0.761905	-3.08382	0.65	-0.00146034	6	high
8O9ESN	0.725	0.9	0.775	0.428571	8.02628	0.8	0.000380466	4.5	high
8R0ICT	0.825	0.95	0.825	0.714286	4.91603	0.5	0.000677313	3.5	high
8R8EEY	0.75	0.883333	0.8	0.761905	19.9043	0.85	-0.0010746	6	high
8T8UDT	0.7	0.966667	0.75	0.714286	2.66045	0.55	-0.000859166	2	high
8U9USS	0.825	0.95	0.85	0.571429	78.2883	0.85	-0.000717722	5	high
97I8ACD	0.65	0.883333	0.7	0.619048	-5.90239	0.95	0.0015545	2.5	high
97r0864oms	0.75	0.95	0.675	0.571429	-67.8458	0.45	0.000105269	2	high
9A1OJM	0.725	0.966667	0.8	0.714286	-20.2645	0.75	0.00105273	3.5	high
